# Supplementary material for: Complex Loci in Human and Mouse Genomes
Source: PLOS journal article supplement (doi:10.1371/journal.pgen.0020047), 2006-04-20
Supplement: S5 (10.1371/journal.pgen.0020047.s005) [file journal.pgen.0020047.s005]

Home - PLOS Collections


 
Skip to content

- Publish with PLOS
  - Which Journal?
  - Submit
  - Publishing FAQs
  - Fees
  - Pay Invoice
  - Metrics
  - Funder Compliance
  - Research Integrity and Publication Ethics
- Research Communities
- Open Science
  - Open Access
  - Preprints
  - Open Data
  - Open Methods
  - Protocols
  - Preregistration
  - Open Code
  - Published Peer Review History
  - Credit
- Resources
  - For Institutions
  - Press and Media
  - Editor Center
  - Peer Review Center
  - Research by PLOS
  - Writing Center
- About PLOS

Search:

Menu

When you choose to publish with PLOS, your research makes an impact. Make your work accessible to all, without restrictions, and accelerate scientific discovery with options like preprints and published peer review that make your work more Open.

Journals

- PLOS Biology
- PLOS Climate
- PLOS Complex Systems
- PLOS Computational Biology
- PLOS Digital Health
- PLOS Genetics
- PLOS Global Public Health
- PLOS Medicine
- PLOS Mental Health
- PLOS Neglected Tropical Diseases
- PLOS ONE
- PLOS Pathogens
- PLOS Sustainability and Transformation
- PLOS Water

More Content

- PLOS Blogs
- PLOS Collections

# **PLOS Collections**

PLOS Collections bring you expert research from active researchers across the field. Covering a connected body of work and evaluated by leading subject experts, our collections make it easier to delve deeper into specific research topics from across the breadth of the PLOS portfolio.

FEATURED COLLECTION

Biology & Life Sciences

A PLOS Collection
Mendel’s legacy in modern genetics

Published July 28, 2022

More About Collections

- Collections Home
- About Collections
- Browse Collections
- Calls for Papers

## **Stay up-to-date on the latest research from your field.** From interdisciplinary collaborations to focused topics, our curated, Open Access collections help you stay connected to your peers.

BROWSE COLLECTIONS BY TOPIC

- Medicine & Health
- Biology & Life Sciences
- Earth & Environment

- Computer & Information Science
- Physics, Chemistry & Materials
- Research Analysis & Policy

View All Collections

RECENT COLLECTIONS

- A PLOS Collection
  Symbiosis across the tree of life

  Published April 15, 2024

  Read more…
- A PLOS Collection
  Early Detection, Screening and Diagnosis of Cancer

  Published February 20, 2024

  In this collection, we showcase a selection of recently published articles exploring the issues in reaching equitable outcomes in cancer related…

  Read more…

CALLS FOR PAPERS

## Get the right eyes on your work by submitting to one of our open Calls for Papers.

We make it our priority to communicate and promote expert research to the widest possible audience. Built by and for researchers actively working in the field, Calls for Papers surface the latest research in emerging topics and explore important issues. These collections are open for active submissions.

View all Calls for Papers

HIGHLIGHTED CALLS FOR PAPERS

Oct
14
2023

Prediction and Mitigation of Natural Hazards

Deadline October 14, 2023

PLOS ONE, PLOS Water and PLOS Climate are excited to announce a cross-journal Call for Papers on Prediction and Mitigation of Natural Hazards…

- X (former Twitter)
- Facebook
- Linkedin

PLOS is a nonprofit 501(c)(3) corporation, #C2354500, and is based in San Francisco, California, US

- Home
- Resources
- Research Communities
- Open Science
- Publish with PLOS
- About PLOS
- Research Integrity and Publication Ethics
- Diversity, Equity and Inclusion
- Press and Media
- Contact
- Pay Invoice
- Careers
- Advertise
- Financial Overview
- Governance
- Privacy Policy
- Cookie Policy
- Terms of Use
- Payment Terms and Conditions
- Text & Data Mining
- Terms of Service

**News & Updates**

Email address

PLOS will use your email address to provide news and updates. You can find out more about how PLOS processes your data by reading our Privacy Policy. You can unsubscribe at any time by clicking the unsubscribe link in our emails or by contacting us at privacy@plos.org.

All fields are required, please check your entry and try again.

Back to top


 
